# Aberrant reduction of telomere repetitive sequences in plasma cell-free DNA for early breast cancer detection

Xi Wu<sup>1</sup>, Hiromi Tanaka<sup>1</sup>

<sup>1</sup>Department of Medical and Molecular Genetics, Indiana University School of Medicine, Indianapolis, IN, USA

**Correspondence to:**

Hiromi Tanaka, **e-mail:** hirtanak@iu.edu

**Keywords:** telomere, plasma cell-free DNA, breast cancer, early cancer detection, real-time qPCR

**Received:** June 09, 2015

**Accepted:** August 13, 2015

**Published:** August 24, 2015

## ABSTRACT

**Excessive telomere shortening is observed in breast cancer lesions when compared to adjacent non-cancerous tissues, suggesting that telomere length may represent a key biomarker for early cancer detection. Because tumor-derived, cell-free DNA (cfDNA) is often released from cancer cells and circulates in the bloodstream, we hypothesized that breast cancer development is associated with changes in the amount of telomeric cfDNA that can be detected in the plasma. To test this hypothesis, we devised a novel, highly sensitive and specific quantitative PCR (qPCR) assay, termed telomeric cfDNA qPCR, to quantify plasma telomeric cfDNA levels. Indeed, the internal reference primers of our design correctly reflected input cfDNA amount ( $R^2 = 0.910$ ,  $P = 7.82 \times 10^{-52}$ ), implying accuracy of this assay. We found that plasma telomeric cfDNA levels decreased with age in healthy individuals ( $n = 42$ ,  $R^2 = 0.094$ ,  $P = 0.048$ ), suggesting that cfDNA is likely derived from somatic cells in which telomere length shortens with increasing age. Our results also showed a significant decrease in telomeric cfDNA level from breast cancer patients with no prior treatment ( $n = 47$ ), compared to control individuals ( $n = 42$ ) ( $P = 4.06 \times 10^{-8}$ ). The sensitivity and specificity for the telomeric cfDNA qPCR assay was 91.49% and 76.19%, respectively. Furthermore, the telomeric cfDNA level distinguished even the Ductal Carcinoma *In Situ* (DCIS) group ( $n = 7$ ) from the healthy group ( $n = 42$ ) ( $P = 1.51 \times 10^{-3}$ ). Taken together, decreasing plasma telomeric cfDNA levels could be an informative genetic biomarker for early breast cancer detection.**

## INTRODUCTION

Telomeres are protective DNA structures that are located at the end of chromosomes, and proper telomere maintenance is indispensable for chromosomal integrity and overall genomic stability. Telomere maintenance is normally controlled by telomerase activity as well as telomerase-associated factors throughout the cell cycle in tissue- and cell type-specific manners [1–3]. It is well known that telomere length in white blood cells is inversely correlated with age, implying that telomere length may serve as a biological clock to determine the lifespan of a cell and an organism [4]. When telomere maintenance is disrupted by excessive erosion of telomeric DNA or loss of telomere binding protein function, the cellular DNA damage response (DDR) becomes activated to repair the dysfunctional telomere [5]. Persistent

DDR induces a permanent proliferation arrest known as replicative senescence, which is thought to function as a tumor suppressor [6–8]. However, dysregulation of the DDR pathway allows cells to proliferate beyond senescence limits. When the cells reach a stage of persistent telomere dysfunction (termed telomere crisis), these aberrant processes lead to telomere fusions causing genomic instability via breakage-fusion-bridge (BFB) cycles. As a result, the ongoing genomic instability could increase the occurrence of further genetic or epigenetic alterations that would favor neoplastic transformation. Therefore, telomere crisis, characterized by extensive telomere erosion, chromosomal fusion, and genomic rearrangements, is an important early event in cancer development [9–11].

Initially, the mean telomere length was measured using Southern blotting, and demonstrated that the majority

of invasive breast carcinomas displayed shorter telomeres than adjacent, benign breast tissues [12–14]. Additionally, results from *in situ* telomere length assessment (qFISH) indicated that modest telomere shortening occurred at the hyperplasia stage and a more significant shortening became prevalent as early as in Ductal Carcinoma *In Situ* (DCIS) [9, 15]. Telomere crisis has also been reported in human mammary epithelial cell *in vitro* culture models. For example, late-passage human mammary epithelial cells escape a stress-associated senescence-like barrier and acquire chromosome aberrations, including telomere fusions and translocations [10, 16]. Moreover, our group has recently demonstrated that telomere fusions are indeed present in early-stage breast tumors including DCIS [17]. Together, these findings provide strong evidence for the occurrence of telomere crisis-initiated genomic instability during early breast cancer development, probably at the transition from hyperplasia to DCIS [9, 15].

Mounting evidence indicates that extracellular, free-nucleic acids are released from the tumor cells and circulate in the bloodstream of cancer patients as tumor-derived cell-free DNAs (cfDNAs), along with normal cell-derived cfDNAs. The tumor-derived circulating cfDNA in plasma constitutes a potential source of genetic material for the identification of tumor-associated alterations, such as microsatellite instability, loss of heterozygosity (LOH), gene mutations, copy-number alternations (CNAs) and methylation [18–22]. Various methods have been established for the measurement of circulating cfDNA and the clinical utility of cfDNA assays has attracted significant attention as potential cancer biomarkers [23, 24]. Most of the current cfDNA assays require information on specific genetic or epigenetic alterations present in the original tumor lesion, therefore are limited to monitoring cancer progression. Alternatively, other cfDNA assays use a panel of frequently mutated genes, although the detection sensitivity still remains unsolved. There are thus far no established assays suitable for early cancer detection. Our new cfDNA assay presented here focuses on early breast cancer detection without the need for any prior information on tumor-specific genetic alterations. Because telomere crisis is present in early-stage breast tumors including DCIS we hypothesize that the tumor-derived cfDNA containing shorter telomeres is released and circulates in the bloodstream, thereby enabling us to quantitate telomeric cfDNA abnormality in plasma of women with breast cancer.

While mammography remains the most commonly used method for the screening and early detection of breast cancer, this procedure is often limited by a high medical cost, high false-positive rate necessitating additional testing and leading to patient anxiety, as well as false-negative results which may lead to delay of diagnosis especially for younger women who has dense breast tissues [25–28]. Biomarkers such as cancer antigen 15-3 (CA 15-3) and carcinoembryonic antigen (CEA) have been widely studied in order to monitor disease progression or response

to therapy in patients post-diagnosed with breast cancer [29–31], however at this point they have unsuccessfully improved patient outcomes. Thus, there is a critical need for new diagnostic tests for breast cancer, especially those associated with early tumor development. Here, we introduce our newly developed quantitative telomeric cfDNA qPCR assay for measuring the levels of telomeric cfDNA in the plasma. Using this assay, we show a clear relationship between early breast cancer development and quantitative changes in plasma telomeric cfDNA. Our method potentially provides a cost-effective, time-efficient, and convenient blood test for early detection of breast cancer.

## RESULTS

### Measurement methodology of telomeric cell-free DNA in plasma

First, we performed a methodological evaluation to determine an appropriate cell-free DNA (cfDNA) extraction method, including sodium iodide (NaI) method [32] and QIAamp DNA blood kit. We found no apparent differences in total cfDNA yield between healthy control group and cancer group isolated by NaI method (Supplementary Fig. S1). In contrast, QIAamp blood kit showed a slightly but significantly lower yield of total cfDNA in healthy group compared to cancer group. In addition, the cfDNA in healthy group extracted using the Qiagen column showed relatively lower yield than those using the NaI method. To eliminate the potential bias that a certain fraction of cfDNA might be lost during extraction with a silica-based membrane utilized in the QIAamp method (e.g., DNA fragments which are smaller and more difficult to extract [33]), we employed NaI method for isolating cfDNA from each plasma sample for this study. After extracting cfDNA, we carefully measured the cfDNA concentration by a picogreen binding assay to ensure that each cfDNA concentration was at least 10 pg/μL, because this concentration provides the minimum amount of input to maintain the accuracy of the qPCR assay and produce consistent results. No significant correlation was detected between the cfDNA yield and age of the patients (data not shown).

Plasma cfDNA is thought to be fragmented and not chromosomal in nature, thereby its DNA ploidy is likely abnormal [34]. Therefore, we expected that single copy genes (such as GAPDH, β-globin) are not suitable for qPCR-based cfDNA assays as internal references. In addition, it is often difficult to amplify single copy genes in ultra-trace amount of circulating cfDNA. To overcome these concerns, we designed four reference primers (see Materials and Methods, Supplementary Table S1) within the Short Interspersed Element (SINE) or Long Interspersed Element (LINE) nucleotide sequences, because approximately 13% and 17% of human genome consists of these non-coding repetitive SINE and LINE

elements, respectively [35]. After screening, we chose one primer set (line121F/line121R) designed within the LINE sequences which produced a single 121-bp amplicon (Fig. 1A), whereas others had either multi-amplicons or a gentle peak under our PCR condition; therefore, they were not suitable for quantifying the total amount of input DNA. Most importantly, threshold cycle (Ct) values of the new primer set (line121F/line121R) showed a linear correlation with cfDNA concentrations (by picogreen binding assay), indicating that this reference primer pair accurately reflects the amount of input DNA with minimal sample-to-sample variations ( $P = 7.82 \times 10^{-52}$ ) (Fig. 1B). To conduct quantitative analyses of the amount of telomeric cfDNA, we generated DNA standard curves using plasmid DNAs with insert sequences of known copy numbers of either telomere or LINE nucleotide sequences (Fig. 1C). The copy number of telomere (T) was determined relative to the copy number of the LINE reference sequence (R) for each cfDNA sample, and expressed as T/R copy ratios. A primer pair for amplifying telomeric sequences was originally designed by Cawthon and produces a single 79-bp amplicon (Fig. 1A) [36]. Throughout all experiments, we included an invariant endogenous control (female diploid genomic DNA) as well as standard plasmid DNAs in each PCR plate to monitor PCR efficiency and maintain accuracy in sample quantitation.

### Plasma telomeric cfDNA amount is inversely associated with age in healthy women

It has been well established that average telomere length in peripheral blood leukocyte shortens with increasing age by 17 – 50 bp per year using Southern

blotting or Cawthon's qPCR assay [37, 38]. Therefore, we were interested in measuring leukocyte telomere length using our samples from healthy women population ( $n = 42$ ,  $27 \leq \text{age} \leq 73$ ). Both single copy gene primer sets, albumin (ALB) and  $\beta$ -globin (HBG) indicated high reproducibility under our PCR condition ( $R^2 = 0.914$ ,  $P < 0.001$ ) (Supplementary Fig. S2A). Consistent with published reports, we confirmed that the healthy women group in this study was also presented with a downward association between leukocyte telomere length and age ( $R^2 = 0.125$ ,  $P = 0.0136$ ) (Fig. 2A). Next, to address a question whether age impacts telomeric cfDNA, we examined the distribution of telomeric cfDNA level using plasma samples from the same healthy women population. Interestingly, plasma telomeric cfDNA level was also inversely associated with age with variation ( $P = 0.0483$ ), suggesting that telomeric cfDNA is likely derived from somatic tissues or cells in which telomere length is influenced by age (Fig. 2B). However, there was no association between plasma telomeric cfDNA and leukocyte telomere length in our healthy sample, suggesting that leukocyte DNA is not a major source of cfDNA production (Fig. 2C).

### Level of telomeric cfDNA in plasma from breast cancer patients

Using the telomeric cfDNA qPCR method described above, we compared telomeric cfDNA levels between two groups, namely healthy individuals ( $n = 42$ ) and a breast cancer group ( $n = 47$ ). The baseline of demographic characteristics was shown in Table 1. To avoid potential factors which may change cfDNA levels, we investigated

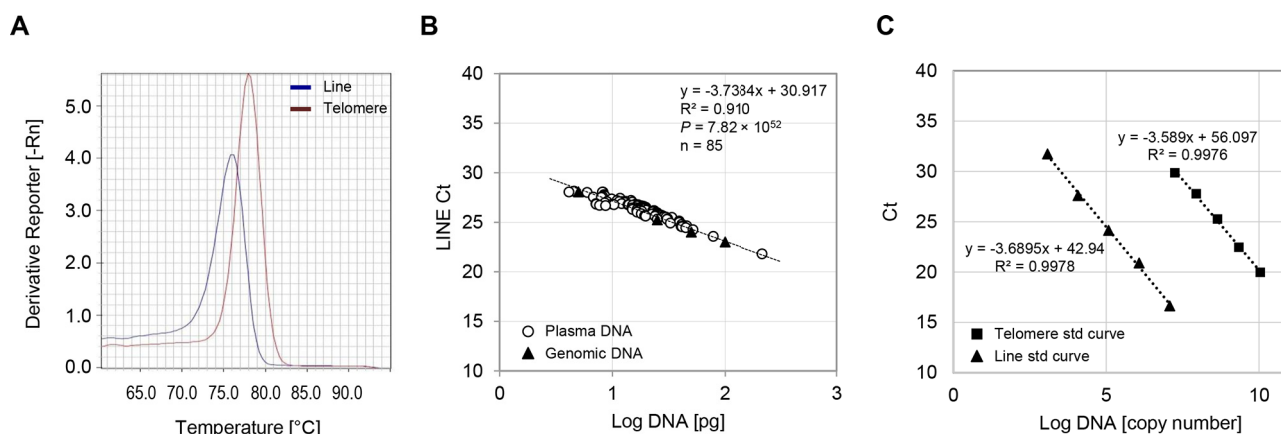

**Figure 1: Methodological validation of the telomeric cfDNA qPCR assay.** A. Representative melting curves of single product amplifications using telc/telg and line121F/line121R primers. PCR was performed under 40 cycles of amplification of human plasma cfDNA. -Rn, the negative first-derivative of the normalized fluorescence generated by the reporter during PCR amplification. B. Amplification of internal reference sequence reflects input DNA amount of both plasma cfDNA and genomic DNA. Concentrations of experimental plasma cfDNAs (circles) as well as a serially diluted female genomic DNA samples (triangles) were determined using the picogreen assay. After qPCR, the amount of input DNA was plotted logarithmically against the Ct value of the reference primers. C. Standard curves of plasmid DNAs for calculating T/R copy ratio. Serially diluted plasmid DNA with known copy numbers of the telomeric or LINE sequences were plotted after the PCR. The amount of plasmid DNA standard used was optimized so that all plasma samples were detected within the linear range of the curves.

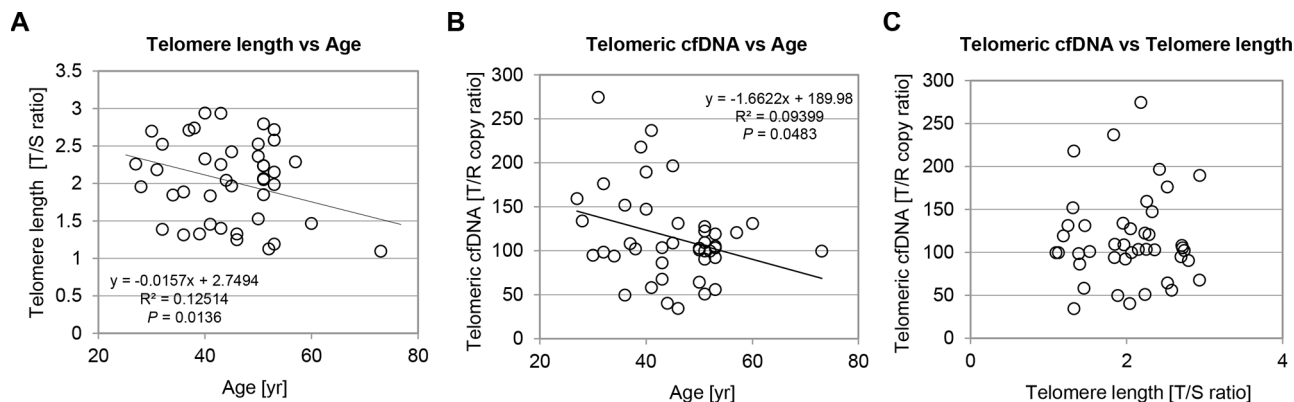

**Figure 2: Chronological age has impact on both leukocyte telomere length and plasma telomeric cfDNA level in the control healthy group.** A–B. Relationships between age and leukocyte telomere length (A) or their paired plasma telomeric cfDNA levels (B) Each data from healthy control subjects ( $n = 42$ ) was plotted with age at time of donation.  $P$ -value of the linear regression was calculated by GraphPad Prism version 5.00. C. No strong association between plasma telomeric cfDNA levels (T/R copy ratio) and lymphocyte telomere length (T/S ratio). All plasma T/R results were plotted against their paired lymphocyte telomere length.

**Table 1: Characteristics of study groups**

|                     | Healthy individuals | Breast cancer patients | $P$ -value          |
|---------------------|---------------------|------------------------|---------------------|
| <b>Total number</b> | 42                  | 47                     | —                   |
| <b>Age, years</b>   | 44.8 ± 9.5          | 51.0 ± 11.5            | 0.007               |
| <b>≤40</b>          | $n = 14$            | $n = 10$               | —                   |
| <b>41–50</b>        | $n = 13$            | $n = 14$               | —                   |
| <b>51≤</b>          | $n = 15$            | $n = 23$               | —                   |
| <b>Sex</b>          | Female              | Female                 | —                   |
| <b>Ethnicity</b>    | Caucasian           | Caucasian              | —                   |
| <b>Height, cm</b>   | 167.3 ± 5.6         | 164.4 ± 8.8            | 0.07 (N.S.*)        |
| <b>Weight, kg</b>   | 62.8 ± 6.0          | 77.3 ± 18.0            | $<5 \times 10^{-6}$ |
| <b>BMI</b>          | 22.4 ± 1.9          | 28.5 ± 6.0             | $<5 \times 10^{-7}$ |

Values expressed with a plus/minus sign are means ± S.D.  
\*N.S., Not significant.

plasma samples from breast cancer patients collected at the time of surgery, prior to any chemo-, radio- or hormone therapies. Overall, the telomeric cfDNA level was significantly lower in the breast cancer group compared to the healthy group. The median telomeric cfDNA as T/R copy ratio in the control and breast cancer group was 103.35 and 50.30, respectively ( $P = 4.06 \times 10^{-8}$ ) (Fig. 3A). We also determined the sensitivity and specificity of this new assay by construction of Receiver Operating Characteristic (ROC) curves (Fig. 3B). Telomeric cfDNA showed the diagnostic accuracy with an area under the ROC curve (AUC) of 0.8652 (95% Confidence Interval: 0.7867–0.9438,  $P < 0.0001$ ), which is a measure of how well a parameter can distinguish between two groups. At the cutoff value of 91.40 (T/R copy ratio) for telomeric cfDNA, the optimal sensitivity and specificity were 91.49% and 75.19% respectively. Moreover, the positive and negative predictive values (PPV and NPV) were 82.35% and 86.84%,

which represents the percentage of patients with a positive and negative test of those individuals who actually have the disease and no disease, respectively. Since we found that telomeric cfDNA decreased with age in the healthy population (Fig. 2A), we divided the results into subsets by age (Fig. 3C). Overall, unlike the control healthy group, there was no correlation between telomeric cfDNA level and age in the breast cancer group. This observation is in agreement with previous findings that telomere length in breast tumor tissues was not associated with age [12], suggesting that a substantial fraction of cfDNA in the plasma of breast cancer patients could be of tumor origin. In the women younger than 41 and older than 51, the T/R cutoff value of 91.40 (T/R copy ratio) readily distinguished healthy from breast cancer patients. However, in the group aged between 41 and 50, telomeric cfDNA level was not able to distinguish breast cancer patient from healthy controls ( $P = 0.053$ ), although we detected a tendency of lower T/R copy ratio in the breast

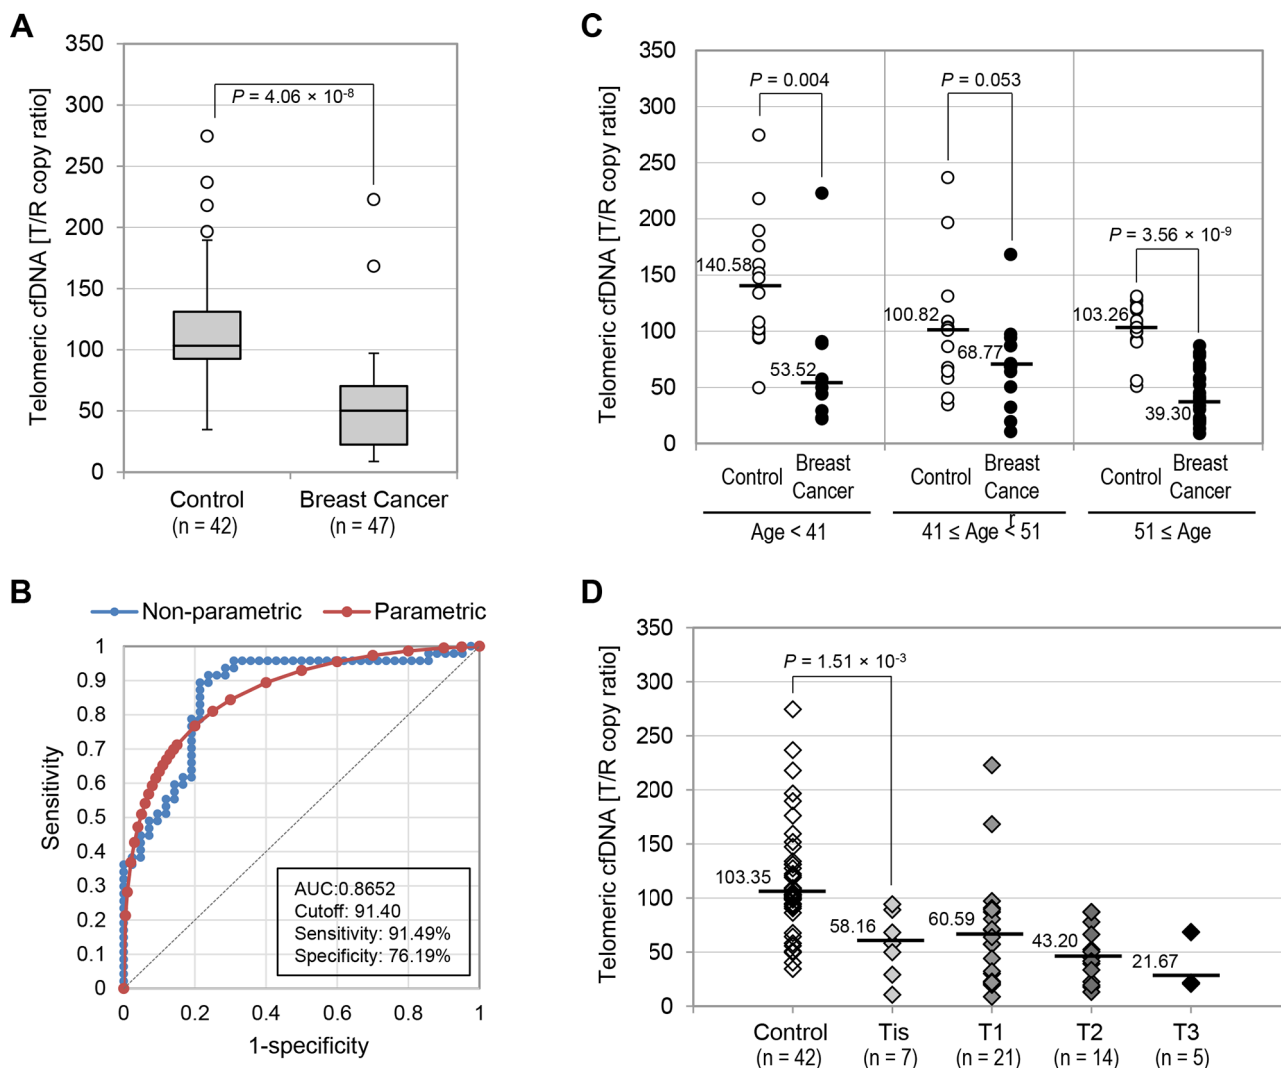

**Figure 3: Telomeric cfDNA levels in breast cancer patients were significantly lower than those from controls.** **A.** Box plot for plasma T/R copy ratios measured in the control and breast cancer groups. **B.** ROC curves for the accuracy of T/R copy ratios in distinguishing breast cancer patients from healthy individuals. Both non-parametric (blue) and fitted parametric curves (red) were shown. **C.** Breast cancer T/R copy ratio abnormality in different age groups. T/R copy ratios were compared between the control group and the breast cancer group in three age categories ( $\leq 40$ ,  $41 - 50$ , and  $51 \leq$ ). **D.** T/R copy ratio comparison in control and breast cancer cases categorized by tumor size. Median T/R copy ratio in each category was shown.

cancer group (Fig. 3C). This statistical insignificance could be due to the small sample size. Since this slight difference mainly resulted from high variation of telomeric cfDNA level in healthy individuals, we speculate that hormonal changes or imbalance at the premenopausal stage may have contributed to this variation.

Several reports suggest that cfDNA levels are associated with the degree of tumor differentiation, size, or disease stage [39–41]. Thus, we categorized the breast cancer population according to the size of the primary tumor ranged from  $T_{is}$  to  $T_3$ . The clinical characteristics of cancer patients were shown in Supplementary Table S2. The  $T_{is}$  stage defines carcinoma *in situ* and all 7 cases from the  $T_{is}$  stage were DCIS in this study. Notably, our results showed that telomeric cfDNA levels clearly discriminated the DCIS group from the control group (58.16 vs. 103.35,

$P = 1.51 \times 10^{-3}$ ) (Fig. 3D). This finding provides evidence that our newly developed telomeric cfDNA qPCR assay has great promise to capture women at the pre-malignant stage. However, we were not able to determine whether an association exists between telomeric cfDNA levels and tumor size, although there is a tendency of lower T/R copy ratio with increasing tumor size. This is likely due to current limited sample size. The breast cancer population was also categorized according to their lymph node involvement (Supplementary Fig. S3A). Again we did not detect an association between telomeric cfDNA level and lymph node invasiveness, pointing out that our assay detects aberrant telomeric cfDNA reduction even at the  $N_0$  stage before any lymph node metastasis. Moreover, it is unlikely that adiposity is associated with telomeric cfDNA levels because the telomeric cfDNA amount in breast

cancer patients is consistently low regardless of Body Mass Index (BMI) (Supplementary Fig. S3B).

### Level of plasma centromeric cfDNA in both healthy and breast cancer women

To determine whether tumor-driven cfDNA was abnormal only in amounts of telomeric sequences or amounts of other repetitive sequences, we investigated centromeric cfDNA levels using the same plasma samples described above. Indeed, there have been several observations of centromere instability, such as centromeric fissions found in human cancer [42, 43]. Pan-centromeric primers were designed within alpha-satellite DNA and can amplify as a single product from at least 15 chromosomes *in silico* (Supplementary Fig. S4A). Overall, the median centromeric cfDNA levels in the control group was  $2.52 \times 10^{-2}$  as C/R copy ratio, and the median centromeric

cfDNA level in the breast cancer group was  $2.31 \times 10^{-2}$  as C/R copy ratio (Fig. 4A). Although this difference was statistically significant ( $P = 0.017$ ), an AUC of the ROC curve indicated that the diagnostic value of centromeric cfDNA was not very high (AUC = 0.6484, 95% Confidence Interval: 0.5328 – 0.7640,  $P = 0.0161$ ) (Fig. 4B). At the cutoff value of  $2.42 \times 10^{-2}$  (C/R copy ratio) for centromeric cfDNA, the optimal sensitivity and specificity were 65.96% and 66.67% respectively. Moreover, in contrast to telomeric cfDNA levels, centromeric cfDNA levels in the healthy control group were not associated with age (Fig. 4C). When the breast cancer cases were subcategorized by tumor size ( $T_{is}$  to  $T_3$ ), our results showed that the difference in centromeric cfDNA levels between the DCIS group and the control group was statistically significant ( $P = 0.0206$ ). However, the actual difference in their C/R copy ratios was merely 10% ( $2.29 \times 10^{-2}$  vs.  $2.52 \times 10^{-2}$ ) (Fig. 4D). Thus, these

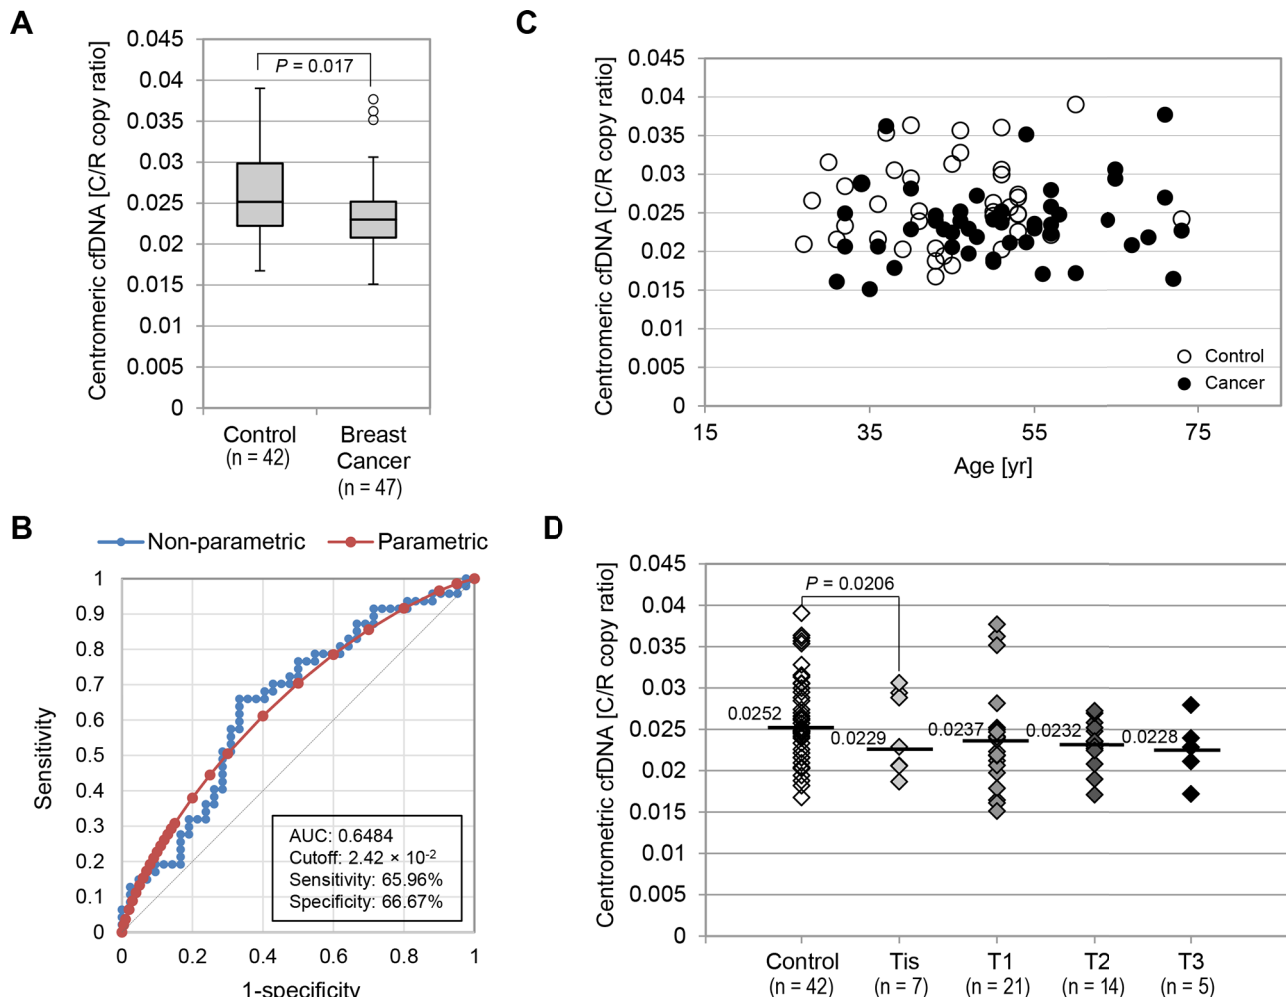

**Figure 4: Centromeric cfDNA levels were not highly valuable as a marker for breast cancer detection.** **A.** Box plot for plasma C/R copy ratios measured in the control and breast cancer groups. **B.** ROC curves for the accuracy of C/R copy ratios in distinguishing breast cancer patients from healthy individuals. Both non-parametric (blue) and fitted parametric curves (red) were shown. **C.** No strong association between centromeric cfDNA levels (C/R copy ratio) and age at time of donation. Open circles, healthy control group; Filled circles, breast cancer cases. **D.** C/R copy ratio comparison in control and breast cancer cases categorized by tumor size. Median C/R copy ratio in each category was shown.

findings suggest that centromeric cfDNA amounts are unlikely to be a desirable marker for cancer detection, although we do not rule out the biological significance of centromeric cfDNA levels in cancer development.

## DISCUSSION

Our present study focused on establishing a new strategy to assess circulating cfDNA for detecting early breast cancer. Since plasma contains ultra-trace amount of circulating cfDNA, roughly around 100 ng per ml of plasma in cancer patients among different laboratories [44, 45], various cfDNA methods often require a certain amplification step to improve enrichment of cfDNA prior to analyzing tumor-specific alterations in cfDNA [46, 47]. The new quantitative real-time PCR method that we applied in this present study has no enrichment step and only requires 50 to 150 pg cfDNA per reaction. Our new method quantitates changes in the amount of repetitive telomeric DNA sequences that are abundant and spread throughout the genome, rather than a single copy sequence per genome.

Circulating cfDNA can be isolated from human plasma, serum and other body fluids, and represents a novel biomarker of interest for cancer diagnosis and monitoring. Increasing studies provide evidence that circulating cfDNA serve as liquid biopsy for monitoring the changes occurring in a patient's cancer in real-time [41, 48]. Initial studies reported that elevated levels of total cfDNA were identified in breast cancer patients compared with healthy controls due to the presence of tumor-driven circulating cfDNA. However, these findings are still inconclusive because large individual variations in cfDNA quantity have been observed among different studies [41, 49, 50]. In this study, we observed no elevated levels of total cfDNA from the cancer group compared to those from the healthy group using the NaI-based extraction method (Supplementary Fig. S1). While the exact mechanism is currently unknown, this could be potentially explained by the following factors: 1) the release of tumor cfDNA might suppress normal somatic cells to release cfDNA, and 2) the systematic capacity of cfDNA clearance/degradation might be higher in breast cancer patients than healthy subjects, thus leading to similar levels of total cfDNA. The integrity of cfDNA has also been investigated by comparing the ratio of apoptotic fragments to non-apoptotic cfDNA fragments [51, 52]. Those studies suggest that apoptotic fragmentations are less abundant in plasma/serum cfDNA from cancer patients compared to that from normal controls. By using qPCR, digital PCR, or sequencing technologies, recent studies reported that *PIK3CA* and/or *TP53* mutations status could be obtained from cfDNA in advanced breast cancer patients before, during and after targeted therapy [20, 48]. However, these studies focused on patients with high tumor burden, and it remains to be evaluated

whether similar sensitivity can be achieved in patients at the earlier stages of breast cancer. Moreover, monitoring these two mutations are not sufficient to capture all types of breast cancer; therefore, a panel of cancer-specific gene mutations would have to be assessed.

To the best of our knowledge, our study is the first to report that pre-malignant DCIS patients can be discriminated from healthy individuals using plasma circulating cfDNA. This finding contributes to accumulating evidence that telomere-based crisis in which telomere erosion, genomic instability, and massive cell death are concomitantly increased in tumor lesions, and can be identified during the transition from ductal hyperplasia to DCIS [9, 15]. Although the biology and physiology of cfDNA circulation is not well understood, our data may support the hypothesis that the lower telomeric cfDNA levels in the breast cancer groups (even at the DCIS stage) result from the presence of tumor-derived cfDNA with shortened telomeres in the bloodstream. Further, these findings may suggest that tumor cells with shortened telomeres might be prone to cell death and preferentially provide cfDNA. Notably, we found that telomeric cfDNA levels in cases with advanced breast tumors (stages II – III) was significantly lower than those in cases at earlier stages of breast cancer (stages 0 – I) ( $P = 7.12 \times 10^{-3}$ , Supplementary Fig. S5). As telomere length at breast tumor lesions shortens with the development of cancer, this result may strengthen our hypothesis that the decreased telomeric cfDNA levels results from the shortening of telomere length at breast cancer tissues. It is thought that plasma cfDNA from cancer patients is a mixture of tumor-derived and non-tumor-derived DNA. A few studies have estimated a small to modest fraction of tumor-derived cfDNA in the total plasma cfDNA of cancer patients (range 1 – 50%, median ~ 4%) [48, 53]. Nonetheless, in this present study we demonstrated that plasma telomeric cfDNA levels were significantly lower in breast cancer patients compared to healthy controls while the exact mechanism is not currently understood. Since all previous studies estimating the tumor-derived fraction used only one or two tumor-specific alterations (e.g. specific chromosome arm loss/gain, allelic mutations) to represent the pool of total tumor cfDNA, it is possible that the tumor-derived cfDNA fractions were underestimated and the actual tumor-derived cfDNA may be more abundant than currently thought. Since the main focus of this study is on early detection of cancer rather than cfDNA biology, future characterization of plasma cfDNA (e.g., size distribution, fraction ratio) in cancer patients would lead to better understanding of the cfDNA biology.

In addition, it is speculated that telomeric cfDNA levels might be influenced by interweaving factors such as metabolic regulation, hormone balance, and nuclease activity levels in the bloodstream [54–56]. In fact, our results show that telomeric cfDNA levels in the healthy

control group were quite variable (range: 34.42 – 274.51, mean: 115.57, as T/R copy ratio), even though we carefully selected the control group by eliminating any potential confounding factors (see Materials and Methods). Nine out of total 42 controls were detected as false positive, and the majority of these were individuals aged between 41 and 50 (6 of 9 cases). While not definitive, we suspect that a phase of menstrual cycle and/or menstruation status might alter normal telomeric cfDNA levels. In the breast cancer group, our telomeric cfDNA data detected a statistical outlier (as false negative) in two cases which are ER<sup>+</sup>/PR<sup>+</sup>/HER2<sup>-</sup> and normal BMI from Stage IA without any family history. One possible explanation of these false negative results could be involvement of ALT (alternative lengthening mechanisms of telomeres) pathway in which tumors often have heterogeneous telomere length with relatively longer telomeres [57]. Indeed, the ALT phenotype has been reported in ~5% of breast epithelial malignancies [58].

Currently telomere length measurement has been utilizing peripheral leukocyte DNA in large cohorts, especially in the scope of estimating cancer risk and mortality. However, results from these studies remain conflicting rather than conclusive. For instance, several case-control studies showed that short leukocyte telomere length was associated with increased risk of breast cancer [59, 60], while others indicated contradictory [61, 62] or insignificant associations [63, 64]. The inconsistent conclusions of these epidemiologic studies are perhaps, in part, explained by the lack of standardized method and analysis between laboratories. Additionally, leukocyte telomere length might not be directly associated with breast epithelial carcinogenesis, because leukocyte telomere length is also influenced by other factors such as smoking, adiposity, exercise, oxidative stress, ultraviolet irradiation, and social and economic status [65, 66]. Therefore, further investigation is critical to understanding the usefulness of leukocyte telomere length as a surrogate marker of cancer risk and mortality. It would also be interesting to further investigate whether our telomere cfDNA qPCR assay can be applied for early detection of not only breast cancer, but other types of cancer as well. If the telomere cfDNA aberration is a universal phenotype in various types of carcinogenesis, this new assay has potential as cancer risk assessment or screening test in other cancer types. It is also important to examine non-cancerous patients with benign disease to determine whether telomeric cfDNA abnormality is correlated specifically with breast carcinogenesis.

In summary, this study highlights the quantitative abnormality of plasma telomeric cfDNA observed in patients with pre-malignant DCIS. The exciting results presented a call for future studies testing the assay's potential for clinical utility. Our approach of measuring the amount of telomeric cfDNA in plasma could serve as a liquid biopsy, which would be useful for improving early cancer detection, either by itself or in combination with other diagnostic tools.

## MATERIALS AND METHODS

### Specimens

The Indiana University Institutional Review Board approved the use of human plasma samples. About 1 mL of frozen plasma samples of breast cancer patients ( $n = 47$ ,  $32 \leq \text{age} \leq 73$ ) and control healthy women ( $n = 42$ ,  $27 \leq \text{age} \leq 73$ ) were obtained through the IU Simon Cancer Center Tissue Procurement and Distribution Core and the Susan G. Komen Tissue bank, respectively. All samples were collected in accordance with standard operating procedures described in the facilities' website and with donor's written informed consent. All healthy samples were obtained from Caucasian women with no family history, no current tobacco nor hormone use, average BMI, and lifetime Gail score < 20%. All breast cancer patient samples were from women who underwent surgery without combination therapies to eliminate potential confounding factors. Blood from cancer patients was obtained at the time of surgery. The demographical and clinical information was shown in Table 1 and Supplementary Table S2.

### Plasma cell-free DNA extraction

Frozen plasma samples were thawed on ice prior to cfDNA isolation and centrifuged for 3 min at  $\geq 11,000 \times g$  in order to remove residual cells, cell debris, and particulate matter. 150  $\mu\text{L}$  of aliquoted supernatant was used for each cfDNA extraction using a Sodium Iodide (NaI)-based method [32]. Briefly, 150  $\mu\text{L}$  plasma was mixed with equal amount of a  $2 \times$  Enzyme reaction solution and proteinase K (Roche) was added to a final concentration of 1 mg/ml. The mixture was incubated at 56°C for 30 minutes, and then combined with 1.5 volume of 7.6 M sodium iodide solution, 1  $\mu\text{L}$  of glycogen (20 mg/ml stock), and 1 volume of isopropanol. After vortexing, the samples were incubated for 30 min at room temperature with agitation. Precipitated cfDNA was centrifuged and washed with 40% w/v isopropanol and then 70% ethanol. Finally, DNA pellet was air-dried and dissolved in 50  $\mu\text{L}$  of TE buffer. For comparison of cfDNA extraction methods, plasma samples were also extracted using the QIAamp DNA Blood Mini kit (Qiagen) according to the manufacturer's instructions with a starting plasma volume of 300  $\mu\text{L}$  and elution of 50  $\mu\text{L}$  in buffer AE.

### Measurement of total plasma DNA concentration

Plasma cfDNA concentrations after extraction were measured using Quant-iT™ PicoGreen dsDNA Assay Kit (Life Technologies) according to the manufacturer's instruction. A female genomic DNA (cat# G152A, Promega) was diluted to 50 pg/ $\mu\text{L}$  and used to generate the low-range standard curve in each plate. Fluorescence



intensity was measured with a Synergy 2 Multi-Mode Reader at emission wavelength of 520 nm and excitation wavelength of 480 nm.

### Quantitative PCR-based cfDNA assays

Real-time quantitative PCR (qPCR) were performed on ABI 7500 Real-Time PCR system (Applied Biosystems). The final volume of PCR reaction was 15  $\mu$ L using 1 $\times$  SYBR Select (Applied Biosystems) including primers and cfDNA as template. cfDNA was added in each primer set using the following ratio; telomere: centromere: LINE = 5: 1: 1. Therefore, if 150 pg cfDNA was used for telomere primers, 30 pg was used for both centromere and LINE primers. telg and telc primers were used for amplification of the telomere signal (T), which generate a 79 bp product (final concentrations 900 nM each) [36]. The primer sequences were as follows: 5'-ACA CTA AGG TTT GGG TTT GGG TTT GGG TTA GTG T-3' for telg, and 5'-TGT TAG GTA TCC CTA TCC CTA TCC CTA TCC CTA TCC CTA ACA-3' for telc. The other primer sequences were used for the pan-centromere signal, cen96F, 5'-TTC ATC TCA CAG AGT TGA ACC TTT CCT TTG-3', and cen96R, 5'-GGC CTC AAA GTG TAC CAA ATA TCC ACT TG-3' (final concentrations 400 nM each). For the reference sequence (R), line121F, 5'-GGA TTA AGA AAA TGT GGC ACA TAT ACA CCA TGG- 3' and line121R, 5'-GAT AGT TTA CTG AGA ATG ATG GTT TCC AAT TTC AT-3' (final concentrations 250 nM each). The thermal cycling profile is Stage 1 for 10 min at 95°C; Stage 2 for 2 cycles of 15 s at 94°C, 15 s at 49°C; and Stage 3 for 40 cycles of 10 s at 94°C, 10 s at 62°C, 10 s at 74°C.

### Analysis of telomeric and centromeric cfDNA qPCR assay

qPCR results were analyzed by generating plasmid DNA standard curves. Therefore, the relative quantitation is based on T/R or C/R copy ratios of each copy number from the standard curves. Five concentrations of a plasmid DNA sample were prepared with known copies of the telomere, centromere, and LINE (Long INterspersed Element) nucleotide sequences by serial dilution (Fig. 1C and Supplementary Fig. S4B). To monitor and compensate for inter-plate variations in PCR efficiency, each plate included standard plasmid DNAs as well as female genomic DNA (Promega). All experimental DNA samples were repeated at least three times in triplicate. All samples have a standard deviation of less than 0.5 for the threshold cycle (Ct) values. Ct values and melting curve analysis were generated by the 7500 software v2.3. The coefficients of variation (CVs) for the Ct values of telomere, centromere, and LINE primers were 1.5%, 2.2%, and 1.0%, respectively. Melting curve analysis was performed on every run to verify specificity and identity of the PCR products. The telomere amount (T)

or centromere amount (C) were presented as T/R or C/R copy ratios where T/R = (telomere copy number) / (Line copy number), and C/R = (centromere copy number) / (Line copy number). The final quantity reported result is the average of three independent experiments.

### Control plasmid DNA preparation for cfDNA assays

The plasmid DNAs containing known sequences of the pan-centromeric or LINE DNA was constructed by ligating the PCR product of the pan-centromere or LINE primers to the pGEM-T easy vector (Promega) or the PCR 2.1 TOPO vector (Life Technologies), respectively. A plasmid containing [TTAGGG]<sub>11</sub> sequences was obtained from Dr. David Gilley (Indiana University). All plasmid DNAs were diluted in PCR grade water. Copy number calculation was performed as described previously [67]. Plasmids were linearized using proper enzymes before use.

### Telomere length qPCR

Paired leukocyte DNAs along with plasma from healthy women were obtained as a lyophilized power after the Komen Tissue Bank was extracted from whole blood samples using the Flex Star automated system with the AGFStar Fresh WB Extraction Kit (Autogen, cat# AGKT-WB-640). Telomere length qPCR was performed ABI 7500 Real-Time PCR system and analyzed as described previously [36, 68]. The telomere primers (telg and telc, final concentrations 900 nM) were used for telomere signal (T). As internal reference (single copy gene signal = 'S'), two primer sets within albumin and  $\beta$ -globin genes were used (final concentrations 500 nM each). The  $\beta$ -globin (HBG) primers were described previously [69]. The albumin (ALB) primer sequences were 5'-TTG AAT TTC TGC TCT CCT GCC TGT T-3' and 5'-GTC ACT TAC TGG CGT TTT CTC ATG C-3'. To calculate the T/S ratios, each DNA standard curve was generated using a pooled female genomic DNA (Promega, G152A) (Supplementary Fig. S2B).

### Statistical analysis

The differences in the distribution of T/R or C/R ratios between breast cancer cases and controls, as well as the final cfDNA yield between the Nal and Qiagen method were compared using the Student's *t*-test, and Pearson's correlation analysis was performed for correlation evaluations. A *P* value of less than 0.05 (two-tailed) was considered significant. Receiver operating characteristic curves (ROCs) were used to evaluate the diagnostic performance of T/R and C/R copy ratios. The non-parametric (empirical) ROC curve, as well as the area under the curve (AUC), standard error, 95% confidence interval (CI), and *P* value were generated using the

GraphPad Prism version 5.00 (GraphPad Software, San Diego, California USA). The fitted, parametric ROC curve and statistical analysis were generated and performed by the Web-based Calculator for ROC curves (Java translated by John Eng, Department of Radiology and Radiological Science, Johns Hopkins University School of Medicine) based on the original Fortran program LABROC4 by Charles Metz & colleagues (Department of Radiology, University of Chicago).

## ACKNOWLEDGMENTS

Samples from the Susan G. Komen Tissue Bank at the IU Simon Cancer Center as well as the IU Simon Cancer Center Tissue Procurement and Distribution Core were used in this study. We thank contributors, including Indiana University who collected samples used in this study, as well as donors and their families, whose help and participation made this work possible. We also thank Harikrishna Nakshatri, Kathy Miller, Brittney-Shea Herbert, and John Spence for critical reading of the manuscript, Kevin Caruana and Garret Hillsdon-Smith for technical assistance, Dan Koller for statistical assistance at an early stage of this project, and Takamitsu Yoshida for reagents.

## CONFLICTS OF INTEREST

No conflict of interests

## FUNDING

This work was supported in part by an Indiana University Simon Cancer Center Breast Cancer Signature pilot grant, an Indiana University School of Medicine Biomedical Research grant, the Showalter Foundation, the Friends for an Earlier Breast Cancer Test<sup>®</sup>, the Susan G. Komen Foundation, and the American Cancer Society.

## REFERENCES

1. Blackburn EH. Switching and signaling at the telomere. *Cell*. 2001; 106:661–673.
2. Palm W, de Lange T. How shelterin protects mammalian telomeres. *Annu Rev Genet*. 2008; 42:301–334.
3. Shay JW, Wright WE. Role of telomeres and telomerase in cancer. *Seminars in cancer biology*. 2011; 21:349–353.
4. Harley CB. Telomere loss: mitotic clock or genetic time bomb? *Mutat Res*. 1991; 256:271–282.
5. O'Sullivan RJ, Karlseder J. Telomeres: protecting chromosomes against genome instability. *Nat Rev Mol Cell Biol*. 2010; 11:171–181.
6. Fumagalli M, Rossiello F, Clerici M, Barozzi S, Cittaro D, Kaplunov JM, Bucci G, Dobрева M, Matti V, Beausejour CM, Herbig U, Longhese MP, d'Adda di Fagnana F. Telomeric DNA damage is irreparable and causes persistent DNA-damage-response activation. *Nature cell biology*. 2012; 14:355–365.
7. Sedelnikova OA, Horikawa I, Zimonjic DB, Popescu NC, Bonner WM, Barrett JC. Senescing human cells and ageing mice accumulate DNA lesions with unrepairable double-strand breaks. *Nature cell biology*. 2004; 6:168–170.
8. Kaul Z, Cesare AJ, Huschtscha LI, Neumann AA, Reddel RR. Five dysfunctional telomeres predict onset of senescence in human cells. *EMBO Rep*. 2012; 13:52–59.
9. Chin K, de Solorzano CO, Knowles D, Jones A, Chou W, Rodriguez EG, Kuo WL, Ljung BM, Chew K, Myambo K, Miranda M, Krig S, Garbe J, Stampfer M, Yaswen P, Gray JW, et al. *In situ* analyses of genome instability in breast cancer. *Nat Genet*. 2004; 36:984–988.
10. Romanov SR, Kozakiewicz BK, Holst CR, Stampfer MR, Haupt LM, Tlsty TD. Normal human mammary epithelial cells spontaneously escape senescence and acquire genomic changes. *Nature*. 2001; 409:633–637.
11. Maser RS, DePinho RA. Connecting chromosomes, crisis, and cancer. *Science*. 2002; 297:565–569.
12. Odagiri E, Kanada N, Jibiki K, Demura R, Aikawa E, Demura H. Reduction of telomeric length and c-erbB-2 gene amplification in human breast cancer, fibroadenoma, and gynecomastia. Relationship to histologic grade and clinical parameters. *Cancer*. 1994; 73:2978–2984.
13. Rha SY, Park KH, Kim TS, Yoo NC, Yang WI, Roh JK, Min JS, Lee KS, Kim BS, Choi JH, Lim HY, Chung HC. Changes of telomerase and telomere lengths in paired normal and cancer tissues of breast. *Int J Oncol*. 1999; 15:839–845.
14. Poonepalli A, Banerjee B, Ramnarayanan K, Palanisamy N, Putti TC, Hande MP. Telomere-mediated genomic instability and the clinico-pathological parameters in breast cancer. *Genes Chromosomes Cancer*. 2008; 47:1098–1109.
15. Meeker AK, Hicks JL, Gabrielson E, Strauss WM, De Marzo AM, Argani P. Telomere Shortening Occurs in Subsets of Normal Breast Epithelium as well as *in Situ* and Invasive Carcinoma. *The American Journal of Pathology*. 2004; 164:925–935.
16. Soler D, Genesca A, Arnedo G, Egozcue J, Tusell L. Telomere dysfunction drives chromosomal instability in human mammary epithelial cells. *Genes Chromosomes Cancer*. 2005; 44:339–350.
17. Tanaka H, Abe S, Huda N, Tu L, Beam MJ, Grimes B, Gilley D. Telomere fusions in early human breast carcinoma. *Proc Natl Acad Sci U S A*. 2012; 109:14098–14103.
18. Schwarzenbach H, Muller V, Stahmann N, Pantel K. Detection and characterization of circulating microsatellite-DNA in blood of patients with breast cancer. *Ann N Y Acad Sci*. 2004; 1022:25–32.
19. Schwarzenbach H, Eichelser C, Kropidlowski J, Janni W, Rack B, Pantel K. Loss of heterozygosity at tumor suppressor genes detectable on fractionated circulating cell-free

- tumor DNA as indicator of breast cancer progression. *Clin Cancer Res.* 2012; 18:5719–5730.
20. Beaver JA, Jelovac D, Balukrishna S, Cochran RL, Croessmann S, Zabransky DJ, Wong HY, Valda Toro P, Cidado J, Blair BG, Chu D, Burns T, Higgins MJ, Stearns V, Jacobs L, Habibi M, et al. Detection of cancer DNA in plasma of patients with early-stage breast cancer. *Clin Cancer Res.* 2014; 20:2643–2650.
  21. Shaw JA, Page K, Blighe K, Hava N, Guttery D, Ward B, Brown J, Ruangpratheep C, Stebbing J, Payne R, Palmieri C, Cleator S, Walker RA, Coombes RC. Genomic analysis of circulating cell-free DNA infers breast cancer dormancy. *Genome research.* 2012; 22:220–231.
  22. Chimonidou M, Strati A, Malamos N, Georgoulas V, Lianidou ES. SOX17 promoter methylation in circulating tumor cells and matched cell-free DNA isolated from plasma of patients with breast cancer. *Clin Chem.* 2013; 59:270–279.
  23. Heitzer E, Ulz P, Geigl JB. Circulating tumor DNA as a liquid biopsy for cancer. *Clin Chem.* 2015; 61:112–123.
  24. Gormally E, Caboux E, Vineis P, Hainaut P. Circulating free DNA in plasma or serum as biomarker of carcinogenesis: practical aspects and biological significance. *Mutat Res.* 2007; 635:105–117.
  25. Rosenberg RD, Yankaskas BC, Abraham LA, Sickles EA, Lehman CD, Geller BM, Carney PA, Kerlikowske K, Buist DS, Weaver DL, Barlow WE, Ballard-Barbash R. Performance benchmarks for screening mammography. *Radiology.* 2006; 241:55–66.
  26. Rosenberg RD, Hunt WC, Williamson MR, Gilliland FD, Wiest PW, Kelsey CA, Key CR, Linver MN. Effects of age, breast density, ethnicity, and estrogen replacement therapy on screening mammographic sensitivity and cancer stage at diagnosis: review of 183,134 screening mammograms in Albuquerque, New Mexico. *Radiology.* 1998; 209:511–518.
  27. Kerlikowske K, Grady D, Barclay J, Sickles EA, Ernster V. Likelihood ratios for modern screening mammography. Risk of breast cancer based on age and mammographic interpretation. *JAMA : the journal of the American Medical Association.* 1996; 276:39–43.
  28. Elmore JG, Barton MB, Moceri VM, Polk S, Arena PJ, Fletcher SW. Ten-year risk of false positive screening mammograms and clinical breast examinations. *N Engl J Med.* 1998; 338:1089–1096.
  29. Lumachi F, Norberto L, Marino F, Basso SM, Marzano B, Chiara GB. Hormone receptor rate, MIB-1 score and serum tumour markers CEA and CA 15–3 relationship in elderly women with pT1–2 breast cancer. *Anticancer Res.* 2010; 30:4701–4704.
  30. Molina R, Auge JM, Farrus B, Zanon G, Pahisa J, Munoz M, Torne A, Filella X, Escudero JM, Fernandez P, Velasco M. Prospective evaluation of carcinoembryonic antigen (CEA) and carbohydrate antigen 15.3 (CA 15.3) in patients with primary locoregional breast cancer. *Clin Chem.* 2010; 56:1148–1157.
  31. Wu SC, Chou FF, Rau KM. Clinical significance of a serum CA 15–3 surge and the usefulness of CA 15–3 kinetics in monitoring chemotherapy response in patients with metastatic breast cancer. *Breast Cancer Res Treat.* 2010; 124:879–882.
  32. Wang L, Hirayasu K, Ishizawa M, Kobayashi Y. Purification of genomic DNA from human whole blood by isopropanol-fractionation with concentrated NaI and SDS. *Nucleic Acids Res.* 1994; 22:1774–1775.
  33. Green MR, Sambrook J, Sambrook J. (2012). *Molecular cloning: a laboratory manual.* (Cold Spring Harbor, N.Y.: Cold Spring Harbor Laboratory Press).
  34. Jahr S, Hentze H, Englisch S, Hardt D, Fackelmayer FO, Hesch RD, Knippers R. DNA fragments in the blood plasma of cancer patients: quantitations and evidence for their origin from apoptotic and necrotic cells. *Cancer Res.* 2001; 61:1659–1665.
  35. Lander ES, Linton LM, Birren B, Nusbaum C, Zody MC, Baldwin J, Devon K, Dewar K, Doyle M, FitzHugh W, Funke R, Gage D, Harris K, Heaford A, Howland J, Kann L, et al. Initial sequencing and analysis of the human genome. *Nature.* 2001; 409:860–921.
  36. Cawthon RM. Telomere length measurement by a novel monochrome multiplex quantitative PCR method. *Nucleic Acids Res.* 2009; 37:e21.
  37. Slagboom PE, Droog S, Boomsma DI. Genetic determination of telomere size in humans: a twin study of three age groups. *American journal of human genetics.* 1994; 55:876–882.
  38. Weischer M, Nordestgaard BG, Cawthon RM, Freiberg JJ, Tybjaerg-Hansen A, Bojesen SE. Short telomere length, cancer survival, and cancer risk in 47102 individuals. *J Natl Cancer Inst.* 2013; 105:459–468.
  39. Zanetti-Dallenbach RA, Schmid S, Wight E, Holzgreve W, Ladewing A, Hahn S, Zhong XY. Levels of circulating cell-free serum DNA in benign and malignant breast lesions. *Int J Biol Markers.* 2007; 22:95–99.
  40. Catarino R, Ferreira MM, Rodrigues H, Coelho A, Nogal A, Sousa A, Medeiros R. Quantification of free circulating tumor DNA as a diagnostic marker for breast cancer. *DNA Cell Biol.* 2008; 27:415–421.
  41. Bettegowda C, Sausen M, Leary RJ, Kinde I, Wang Y, Agrawal N, Bartlett BR, Wang H, Luber B, Alani RM, Antonarakis ES, Azad NS, Bardelli A, Brem H, Cameron JL, Lee CC, et al. Detection of circulating tumor DNA in early- and late-stage human malignancies. *Science translational medicine.* 2014; 6:224ra224.
  42. Martinez AC, van Wely KH. Centromere fission, not telomere erosion, triggers chromosomal instability in human carcinomas. *Carcinogenesis.* 2011; 32:796–803.
  43. Slee RB, Steiner CM, Herbert BS, Vance GH, Hickey RJ, Schwarz T, Christan S, Radovich M, Schneider BP, Schindelbauer D, Grimes BR. Cancer-associated alteration of pericentromeric heterochromatin may contribute to chromosome instability. *Oncogene.* 2012; 31:3244–3253.

44. Beau-Faller M, Gaub MP, Schneider A, Ducrocq X, Massard G, Gasser B, Chenard MP, Kessler R, Anker P, Stroun M, Weitzenblum E, Pauli G, Wihlm JM, Quoix E, Oudet P. Plasma DNA microsatellite panel as sensitive and tumor-specific marker in lung cancer patients. *Int J Cancer*. 2003; 105:361–370.
45. Lecomte T, Berger A, Zinzindohoue F, Micard S, Landi B, Blons H, Beaune P, Cugnenc PH, Laurent-Puig P. Detection of free-circulating tumor-associated DNA in plasma of colorectal cancer patients and its association with prognosis. *Int J Cancer*. 2002; 100:542–548.
46. Li J, Harris L, Mamon H, Kulke MH, Liu WH, Zhu P, Mike Makrigiorgos G. Whole genome amplification of plasma-circulating DNA enables expanded screening for allelic imbalance in plasma. *J Mol Diagn*. 2006; 8:22–30.
47. Schmitt MW, Fox EJ, Prindle MJ, Reid-Bayliss KS, True LD, Radich JP, Loeb LA. Sequencing small genomic targets with high efficiency and extreme accuracy. *Nature methods*. 2015; 12:423–425.
48. Dawson SJ, Tsui DW, Murtaza M, Biggs H, Rueda OM, Chin SF, Dunning MJ, Gale D, Forshew T, Mahler-Araujo B, Rajan S, Humphray S, Becq J, Halsall D, Wallis M, Bentley D, et al. Analysis of circulating tumor DNA to monitor metastatic breast cancer. *N Engl J Med*. 2013; 368:1199–1209.
49. Chimingqi M, Moutereau S, Pernet P, Conti M, Barbu V, Lemant J, Sacko M, Vaubourdolle M, Loric S. Specific real-time PCR vs. fluorescent dyes for serum free DNA quantification. *Clinical chemistry and laboratory medicine : CCLM / FESCC*. 2007; 45:993–995.
50. Kohler C, Radpour R, Barekati Z, Asadollahi R, Bitzer J, Wight E, Burki N, Diesch C, Holzgreve W, Zhong XY. Levels of plasma circulating cell free nuclear and mitochondrial DNA as potential biomarkers for breast tumors. *Mol Cancer*. 2009; 8:105.
51. Wang BG, Huang HY, Chen YC, Bristow RE, Kassaei K, Cheng CC, Roden R, Sokoll LJ, Chan DW, Shih Ie M. Increased plasma DNA integrity in cancer patients. *Cancer Res*. 2003; 63:3966–3968.
52. Umetani N, Giuliano AE, Hiramatsu SH, Amersi F, Nakagawa T, Martino S, Hoon DS. Prediction of breast tumor progression by integrity of free circulating DNA in serum. *J Clin Oncol*. 2006; 24:4270–4276.
53. Jiang P, Chan CW, Chan KC, Cheng SH, Wong J, Wong VW, Wong GL, Chan SL, Mok TS, Chan HL, Lai PB, Chiu RW, Lo YM. Lengthening and shortening of plasma DNA in hepatocellular carcinoma patients. *Proc Natl Acad Sci U S A*. 2015; 112:E1317–1325.
54. Goya RG, Console GM, Spinelli OM, Carino MH, Riccillo F, Corrons FJ. Glucocorticoid-induced apoptosis in lymphoid organs is associated with a delayed increase in circulating deoxyribonucleic acid. *Apoptosis*. 2003; 8:171–177.
55. Cherepanova AV, Tamkovich SN, Bryzgunova OE, Vlassov VV, Laktionov PP. Deoxyribonuclease activity and circulating DNA concentration in blood plasma of patients with prostate tumors. *Ann N Y Acad Sci*. 2008; 1137:218–221.
56. Haghiac M, Vora NL, Basu S, Johnson KL, Presley L, Bianchi DW, Hauguel-de Mouzon S. Increased death of adipose cells, a path to release cell-free DNA into systemic circulation of obese women. *Obesity (Silver Spring)*. 2012; 20:2213–2219.
57. Bryan TM, Englezou A, Dalla-Pozza L, Dunham MA, Reddel RR. Evidence for an alternative mechanism for maintaining telomere length in human tumors and tumor-derived cell lines. *Nat Med*. 1997; 3:1271–1274.
58. Heaphy CM, Subhawong AP, Hong SM, Goggins MG, Montgomery EA, Gabrielson E, Netto GJ, Epstein JI, Lotan TL, Westra WH, Shih Ie M, Iacobuzio-Donahue CA, Maitra A, Li QK, Eberhart CG, Taube JM, et al. Prevalence of the alternative lengthening of telomeres telomere maintenance mechanism in human cancer subtypes. *Am J Pathol*. 2011; 179:1608–1615.
59. Shen J, Gammon MD, Terry MB, Wang Q, Bradshaw P, Teitelbaum SL, Neugut AI, Santella RM. Telomere length, oxidative damage, antioxidants and breast cancer risk. *Int J Cancer*. 2009; 124:1637–1643.
60. Qu S, Wen W, Shu XO, Chow WH, Xiang YB, Wu J, Ji BT, Rothman N, Yang G, Cai Q, Gao YT, Zheng W. Association of leukocyte telomere length with breast cancer risk: nested case-control findings from the Shanghai Women's Health Study. *American journal of epidemiology*. 2013; 177:617–624.
61. Svenson U, Nordfjall K, Stegmayr B, Manjer J, Nilsson P, Tavelin B, Henriksson R, Lenner P, Roos G. Breast cancer survival is associated with telomere length in peripheral blood cells. *Cancer Res*. 2008; 68:3618–3623.
62. Gramatges MM, Telli ML, Balise R, Ford JM. Longer relative telomere length in blood from women with sporadic and familial breast cancer compared with healthy controls. *Cancer Epidemiol Biomarkers Prev*. 2010; 19:605–613.
63. Shen J, Terry MB, Gurvich I, Liao Y, Senie RT, Santella RM. Short telomere length and breast cancer risk: a study in sister sets. *Cancer Res*. 2007; 67:5538–5544.
64. Pooley KA, Sandhu MS, Tyrer J, Shah M, Driver KE, Luben RN, Bingham SA, Ponder BA, Pharoah PD, Khaw KT, Easton DF, Dunning AM. Telomere length in prospective and retrospective cancer case-control studies. *Cancer Res*. 2010; 70:3170–3176.
65. Needham BL, Adler N, Gregorich S, Rehkopf D, Lin J, Blackburn EH, Epel ES. Socioeconomic status, health behavior, and leukocyte telomere length in the National Health and Nutrition Examination Survey, 1999–2002. *Soc Sci Med*. 2013; 85:1–8.
66. Han J, Qureshi AA, Prescott J, Guo Q, Ye L, Hunter DJ, De Vivo I. A prospective study of telomere length and the risk of skin cancer. *J Invest Dermatol*. 2009; 129:415–421.

67. O'Callaghan NJ, Fenech M. A quantitative PCR method for measuring absolute telomere length. *Biol Proced Online*. 2011; 13:3.
68. Cawthon RM. Telomere measurement by quantitative PCR. *Nucleic Acids Res*. 2002; 30:e47.
69. Tanaka H, Beam MJ, Caruana K. The presence of telomere fusion in sporadic colon cancer independently of disease stage, TP53/KRAS mutation status, mean telomere length, and telomerase activity. *Neoplasia*. 2014; 16:814–823.
